# Supplementary material for: Neutrophil membrane camouflaged hybrid nanozymes for enhanced starvation/photothermal tumor therapy
Source: Royal Society of Chemistry journal article supplement (doi:10.1039/d2nj03014d), 2022-01-01
Supplement: d2nj03014d1.pdf [file d2nj03014d1.pdf]

Supplementary data of

## Neutrophil membrane camouflaged hybrid nanozyme for enhanced starvation/photothermal tumor therapy

Minghui Li <sup>a,b</sup>, Xinyu Cui <sup>a</sup>, Chao Li <sup>a</sup>, and Xiaojun Han\* <sup>a</sup>

<sup>a</sup> State Key Laboratory of Urban Water Resource and Environment, School of Chemical Engineering and Technology, Harbin Institute of Technology, Harbin, 150001, China

<sup>b</sup> Department of Pharmaceutics, Daqing Campus of Harbin Medical University, Daqing, 163319, China

Email: hanxiaojunhit@edu.cn.

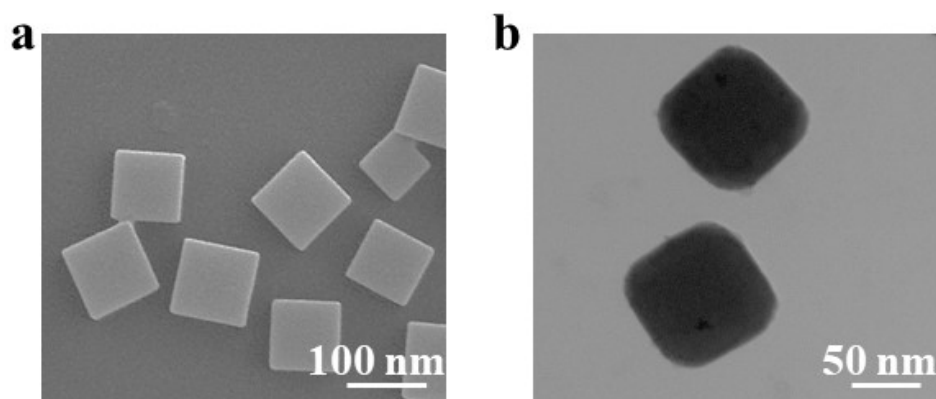

**Fig. S1** SEM (a) and TEM (b) images of PB nanoparticles.

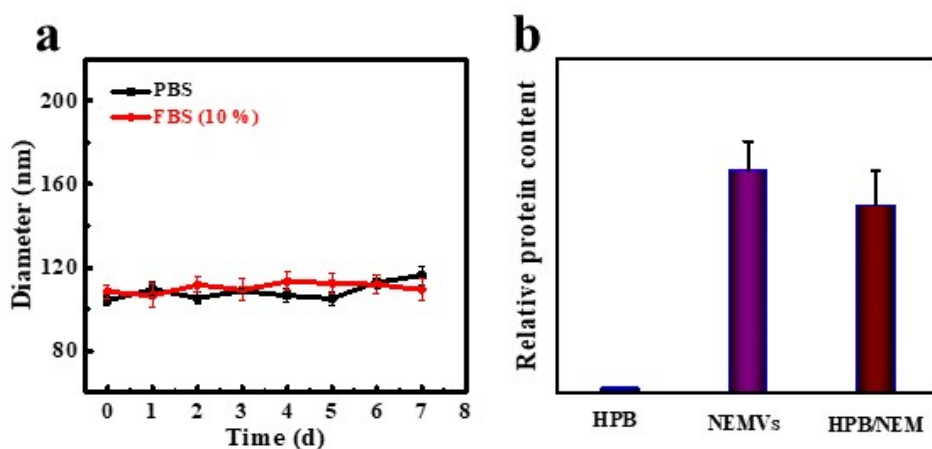

**Fig. S2** (a) The hydrodynamic particle size of nanoparticles in PBS and FBS (10 %) as a function of time. (b) BCA kit for membrane protein content.

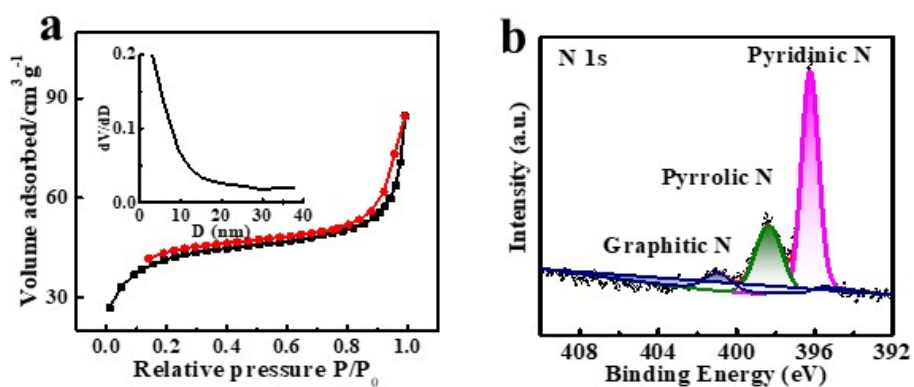

**Fig. S3**  $N_2$ -adsorption-desorption isotherms (inset: pore diameter distribution) (a) and high-resolution XPS spectrum of N 1s (b) of PB nanoparticles.

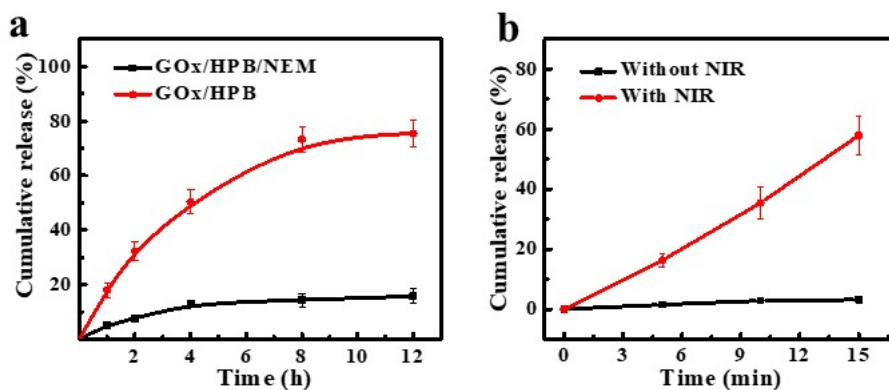

**Fig. S4** (a) The GOx release curve from HPB/NEM and HPB for 12h *in vitro*. (b) The release profile of GOx from HPB/NEM with or without 808 nm laser irradiation.

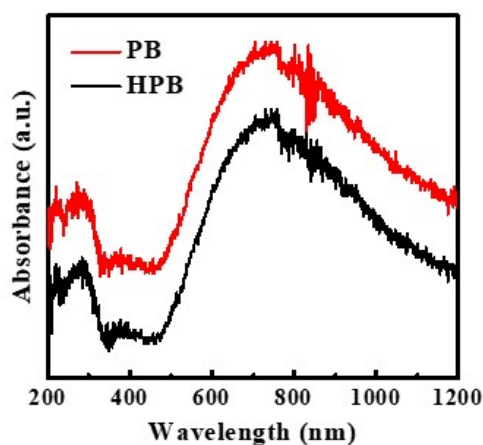

**Fig. S5** UV-Vis-NIR spectra of PB and HPB powder.

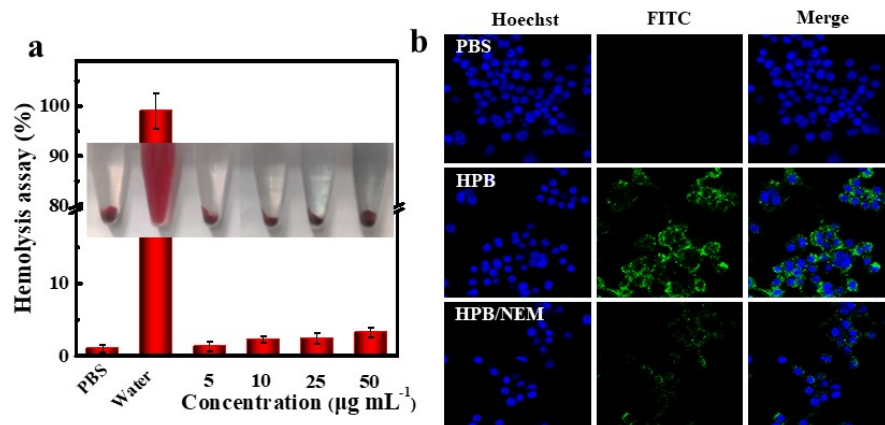

**Fig. S6** (a) Hemolysis quantification of various concentrations of HPB/NEM. (b) CLSM images of RAW264.7 cells cultured with PBS, HPB, and HPB/NEM.

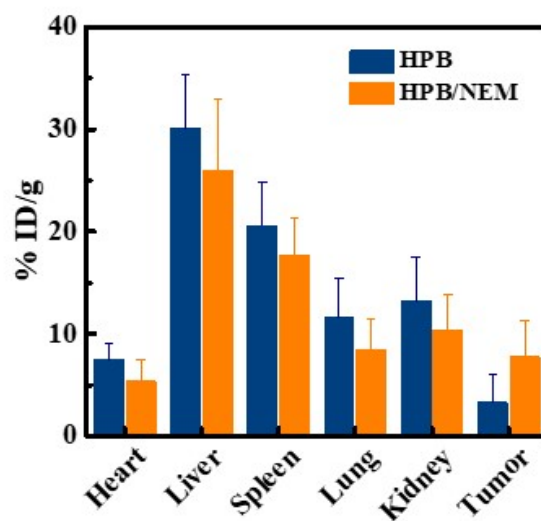

**Fig. S7** Content of Fe in major organs after 24 h post-administration.

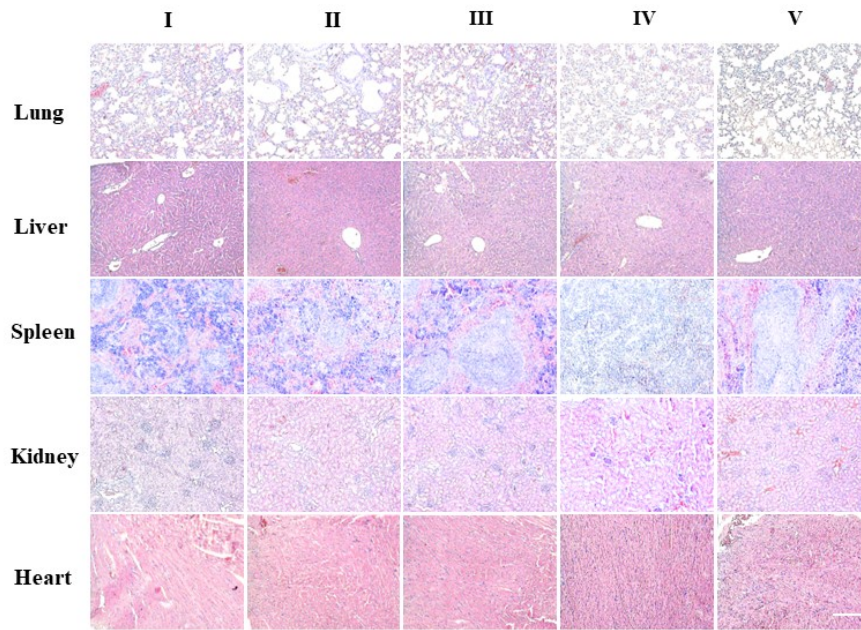

**Fig.S8** H&E staining of main organ (lung, liver, spleen, kidney, heart) after C6 tumor-bearing mice treatment for 14 days (group I: PBS, group II: NIR, group III: GOx/NEM, group IV: HPB/NEM+ NIR, group V: GOx/HPB/NEM+ NIR). Scale bar is 100 $\mu$ m
